# Supplementary material for: How much K is oK? – Evaluating different methods for K-concentration determination and the effect of the internal K-concentration on feldspar luminescence dating
Source: Copernicus journal article supplement (doi:10.5194/egusphere-2025-806), 2025-03-06
Supplement: Supplementary file 1 [file egusphere-2025-806-supplement.zip]

## Sheet: Tabelle1
Literature review | search date: 23.01.2024 | Keywords: luminescence, feldspar (web of science n=1664)
Abbreviations for cited references:
HB	Huntley, D.J., Baril, M.R., 1997. The K content of the K-feldspars being measured in optical dating or in thermoluminescence dating. Ancient TL 15, 3.
S	Smedley, R.K., Duller, G.A.T., Pearce, N.J.G., Roberts, H.M., 2012. Determining the K-content of single-grains of feldspar for luminescence dating. Radiation Measurements, Proceedings of the 13th International Conference on Luminescence and Electron Spin Resonance Dating, 10–14 July, 2011, Toruń, Poland 47, 790–796. https://doi.org/10.1016/j.radmeas.2012.01.014
M	Mejdahl, V., 1979. Thermoluminescence dating: beta-dose attenuation in quartz grains. Archaeometry 21, 61–72.
ZL	Zhao, H., Li, S.-H., 2005. Internal dose rate to K-feldspar grains from radioactive elements other than potassium. Radiation Measurements 40, 84–93. https://doi.org/10.1016/j.radmeas.2004.11.004
L	Li, B., Li, S.-H., Wintle, A., 2008a. Overcoming Environmental Dose Rate Changes in Luminescence Dating of Waterlain Deposits. Geochronometria 30, 33–40. https://doi.org/10.2478/v10003-008-0003-z
HH	Huntley, D.J., Hancock, R.G.V., 2001. The Rb contents of the K-feldspar grains being measured in optical dating. Ancient TL 19, 43–46.
T	Taratunina, N.A., Buylaert, J.-P., Kurbanov, R.N., Yanina, T.A., Makeev, A.O., Lebedeva, M.P., Utkina, A.O., Murray, A.S., 2022. Late Quaternary evolution of lower reaches of the Volga River (Raygorod section) based on luminescence dating. Quaternary Geochronology 72, 101369. https://doi.org/10.1016/j.quageo.2022.101369
R	Rui, X., Guo, Y.-J., Zhang, J.-F., Hu, Y., Mei, H.-J., Wang, Y.-P., Xie, F., Bo, L., n.d. Luminescence chronology of the Palaeolithic–Neolithic transition in the Yujiagou site at the Nihewan Basin, northern China - Rui - 2019 - Journal of Quaternary Science - Wiley Online Library.
La	Lamothe, M., Balescu, S., Auclair, M., 1994. Natural IRSL intensities and apparent luminescence ages of single feldspar grains extracted from partially bleached sediments. Radiation Measurements 23, 555–561. https://doi.org/10.1016/1350-4487(94)90099-X
G	Guo, Y., Li, B., Zhao, H., 2020. Comparison of single-aliquot and single-grain MET-pIRIR De results for potassium feldspar samples from the Nihewan Basin, northen China. Quaternary Geochronology 56, 101040. https://doi.org/10.1016/j.quageo.2019.101040
M2	Mejdahl, V., 1987. Internal radioactivity in quartz and feldspar grains. Ancient TL 5, 10–17.
FL	Fu, X., Li, S.-H., 2013. A modified multi-elevated-temperature post-IR IRSL protocol for dating Holocene sediments using K-feldspar. Quaternary Geochronology 17, 44–54.
L2	Li, B., Li, S.-H., Wintle, A.G., Zhao, H., 2008b. Isochron dating of sediments using luminescence of K-feldspar grains. Journal of Geophysical Research: Earth Surface 113. https://doi.org/10.1029/2007JF000900
HL	Huntley, D.J., Lamothe, M., 2001. Ubiquity of anomalous fading in K-feldspars and the measurement and correction for it in optical dating. Can. J. Earth Sci. 38, 1093–1106. https://doi.org/10.1139/e01-013
SP	Smedley, R.K., Pearce, N.J.G., 2016. Internal U, Th and Rb concentrations of alkali-feldspar grains: Implications for luminescence dating. Quaternary Geochronology 35, 16–25. https://doi.org/10.1016/j.quageo.2016.05.002
BL	Barré, M., Lamothe, M., 2010. Luminescence dating of archaeosediments: A comparison of K-feldspar and plagioclase IRSL ages. Quaternary Geochronology, 12th International Conference on Luminescence and Electron Spin Resonance Dating (LED 2008) 5, 324–328. https://doi.org/10.1016/j.quageo.2009.03.004
SB	Smith, J.V., Brown, W.L., 1988. Feldspar Minerals: Volume 1 Crystal Structures, Physical, Chemical, and Microtextural Properties, Second Revised and Extended Edition. ed. Springer Berlin Heidelberg, Berlin, Heidelberg. https://doi.org/10.1007/978-3-642-72594-4
L3	Li, B., Li, S.-H., Wintle, A.G., Zhao, H., 2007. Isochron measurements of naturally irradiated K-feldspar grains. Radiation Measurements 42, 1315–1327. https://doi.org/10.1016/j.radmeas.2007.09.008
DK	Dütsch, C., Krbetschek, M.R., 1997. New methods for a better internal 40K dose rate determination. Radiation Measurements, Proceedings of the 8th International Conference on Luminescence and Electron Spin Resonance Dating 27, 377–381. https://doi.org/10.1016/S1350-4487(96)00153-9
L4	Li, B., Li, S.-H., Duller, G.A.T., Wintle, A.G., 2011. Infrared stimulated luminescence measurements of single grains of K-rich feldspar for isochron dating. Quaternary Geochronology 6, 71–81. https://doi.org/10.1016/j.quageo.2010.02.003
No. from web of science search	No. within the 432 studies analysed	Titel	Year	DOI	Reference(s)/determination method(s)	K concentration and error [%]	Group
1	1	A comprehensive dataset of luminescence chronologies and environmental proxy indices of loess-paleosol deposits across Asia	2024	10.1038/s41612-023-00555-4	HB + M	12.5 ± 0.5	1
2	2	Age-depth model for uppermost Ndutu Beds constrains Middle Stone Age technology and climate-induced paleoenvironmental changes at Olduvai Gorge (Tanzania)	2024	10.1016/j.jhevol.2023.103465	S	10 ± 2	1
8	3	Post-violet infrared stimulated luminescence (pVIRSL) dating protocol for potassium feldspar	2024	10.1016/j.quageo.2023.101487	HB	12.5 ± 0.5	1
9	4	A fluvial record of late Quaternary climate changes and tectonic uplift along the Marche Piedmont Zone of the Apennines: New insights from the Tesino River (Italy)	2024	10.1016/j.geomorph.2023.108971	HB	12.5 ± 0.5	1
11	5	Sedimentary facies and chronological study for a Late Pleistocene sand layer with swash cross bedding within a sand hill at north of Poyang Lake, as inferred from sedimentary structure and optical dating of K-feldspar and quartz grains	2023	10.1016/j.quaint.2023.10.001	ZL + L	13 ± 1	1
15	6	The signature of accumulated permanent uplift, northern Cascadia subduction zone	2023	10.1017/qua.2023.59	S	10 ± 3	1
16	7	Testing infrared radiofluorescence dating on polymineral fine-grains from the Luochuan loess-palaeosol sequence, Chinese loess plateau	2024	10.1016/j.quageo.2023.101485	measured with XRF attachment	11.98 ± 0.24 (11.7-12.4 [11.7, 11.7, 12, 12, 12.1, 12.4) not clearly stated what they used	2
19	8	Human dispersals out of Africa via the Levant	2023	10.1126/sciadv.adi6838	HB	12.5 ± 0.5	1
22	9	Evidence for the earliest structural use of wood at least 476,000 years ago	2023	10.1038/s41586-023-06557-9	β-counter measurement used HB	12.5 ± 0.5	3
25	10	Testing the potential of pulsed post-IR IRSL dating on Chinese loess deposits	2023	10.1016/j.quageo.2023.101469	HB + ZL	12.5 ± 1	1
26	11	By the lakeshore: Multi-scalar geoarchaeology in the Turkana Basin at GaJj17, Koobi Fora (Kenya)	2023	10.1016/j.quascirev.2023.108257	HB	12.5 ± 0.5	1
29	12	Deglaciation of northwestern Greenland during Marine Isotope Stage 11	2023	10.1126/science.ade4248	HB	12.5 ± 0.5	1
30	13	Late Quaternary hydroclimatic variations in the hyper-arid Dunhuang Basin, northwestern China	2023	10.1016/j.palaeo.2023.111693	HB	12.5 ± 0.5	1
37	14	Pliocene-Pleistocene hydrology and pluvial lake during Marine Isotope Stages 5a and 4, Deep Springs Valley, western Great Basin, Inyo County, California	2023	10.1017/qua.2023.20	not mentioned	not mentioned	4
39	15	Evolution of soil porosity in loess-palaeosol sequences of the Ebro Valley, NE Iberia	2023	10.1016/j.catena.2023.107244	not mentioned	not mentioned	4
40	16	Late Quaternary evolution of Daihai Lake in northern China and implications to the variation of the East Asian summer monsoon	2023	10.1016/j.quascirev.2023.108097	HH	12.5 ± 0.5	1
41	17	Evolution and migration of the highest megadunes on Earth	2023	10.1016/j.gloplacha.2023.104133	HH + ZL	13 ± 1	1
42	18	Youngest Toba Tuff deposits in the Gundlakamma River basin, Andhra Pradesh, India and their role in evaluating Late Pleistocene behavioral change in South Asia	2023	10.1017/qua.2023.13	HB	12.5 ± 0.5	1
43	19	Luminescence dating of anthropogenic deposits from Tall ZarMODIFIER LETTER LEFT HALF RINGa in the Jordan Valley	2023	10.1111/arcm.12871	HB + ZL	12.5 ± 0.5	1
44	20	Mega-lake formation in the eastern Hetao Basin, China, during marine isotope stages 7 and 5: A comparison of quartz and feldspar luminescence dating	2023	10.3389/feart.2023.1177629	HB	12.5 ± 0.5	1
45	21	Channel Incision Ages to the Rescue: An Improved Age for the Penultimate Earthquake That Ruptured the Carrizo Section of the South- Central San Andreas Fault	2023	10.1785/0120220189	HB	12.5 ± 0.5	1
47	22	Deciphering timing and rates of Central German Chernozem/Phaeozem formation through high resolution single-grain luminescence dating	2023	10.1038/s41598-023-32005-9	S	10 ± 2	1
48	23	Comparison of feldspar dating protocols for loess samples older than 70 ka from the Tianshan Mountains, arid central Asia	2023	10.1016/j.quaint.2023.01.014	HH	12.5 ± 1	1
49	24	Progress and pitfalls of the SAR protocol for the quartz violet stimulated luminescence (VSL) signal: A case study from Sardinia	2023	10.1016/j.quageo.2023.101433	HB	12.5 ± 0.5	1
51	25	Pleistocene-Holocene deformation and seismic history of the Kalabagh Fault in Pakistan using OSL and post-IR IRSL dating	2023	10.1016/j.quaint.2022.01.007	HB + HH + ZL	12.5 ± 1	1
52	26	A Novel Approach to Quantify Sediment Transfer and Storage in Rivers-Testing Feldspar Single-Grain pIRIR Analysis and Numerical Simulations	2023	10.1029/2022JF006727	stated they used the same as 10.1007/s12594-012-0043-x (no. 928 in this list) but they did not mention what they used	none?	4
54	27	Luminescence ages and new interpretations of the timing and deposition of Quaternary sediments at Natural Trap Cave, Wyoming	2023	10.1016/j.quaint.2022.01.005	not mentioned	not mentioned	4
55	28	Palaeoenvironmental research at Hawelti-Melazo (Tigray, northern Ethiopia) - insights from sedimentological and geomorphological analyses	2023	10.5194/egqsj-72-37-2023	HB	12.5 ± 0.5	1
59	29	K-feldspar pIRIR150 dating of the Late Pleistocene sediments in the NW Khangai Mountains (Mongolia) using a standardized dose-response curve approach	2023	10.3389/feart.2022.939852	HB	12.5 ± 0.5	1
61	30	Testing the Applicability of Quartz and Feldspar for Luminescence Dating of Pleistocene Alluvial Sediments in the Tatra Mountain Foothills, Slovakia	2023	10.2478/geochr-2023-0002	HB	12.5 without error	1
71	31	Glaciofluvial sequences recording the Birrfeld Glaciation (MIS 5d-2) in the Bern area, Swiss Plateau	2022	10.1186/s00015-022-00414-z	HB	12.5 ± 0.5	1
74	32	Single-grain K-feldspar pIRIR dating of the Shalongka archeological site revealed the relationship between monsoon, overbank flooding, and human occupation during the Holocene on the northeastern Tibetan Plateau	2022	10.1016/j.quascirev.2022.107848	HB	12.5 ± 0.5	1
75	33	Continuous technological and behavioral development of late Pleistocene hominins in central South China: Multidisciplinary analysis at Sandinggai	2022	10.1016/j.quascirev.2022.107850	HB	12.5 ± 0.5	1
78	34	Multi dating approach of long marine core sediments from the south-eastern continental shelf of Korea: Comparison of SAR OSL, TT-OSL and pIRIR dates	2022	10.1016/j.quageo.2022.101338	not mentioned	not mentioned	4
82	35	Luminescence dating at Border Cave: attempts, questions, and new results	2022	10.1016/j.quascirev.2022.107787	HB	12.5 ± 2.5	1
84	36	An absolutely dated record of climate change over the last three glacial-interglacial cycles from Chinese loess deposits	2022	10.1130/G50125.1	HB + ZL	13 ± 1	1
87	37	Coeval minimum south American and maximum Antarctic last glacial maximum dust deposition: A causal link?	2022	10.1016/j.quascirev.2022.107768	HB	12.5 without error	1
90	38	Luminescence dating of Enigmatic rock structures in New England, USA	2022	10.1016/j.quageo.2022.101402	S but used a larger error to account for variability within their samples	10 ± 3	1
91	39	The upper Pleistocene loess-palaeosol sequence at solonovka on the Cis-Altai plain, west Siberia - First luminescence dating results	2022	10.1016/j.quageo.2022.101384	ZL	12.5 without error	1
92	40	Testing the potential of a standardized growth curve approach for improving the applicability and performance of fading correction	2022	10.1016/j.quageo.2022.101375	HB	12.5 ± 0.5	1
93	41	A detailed luminescence chronology of the Lower Volga loess-palaeosol sequence at Leninsk	2022	10.1016/j.quageo.2022.101376	T	12.5%	1
94	42	Constraining the age of Quaternary megafloods in the Altai Mountains (Russia) using luminescence	2022	10.1016/j.quageo.2022.101399	Added 0.94Gy/ka onto the quartz dose rate	not mentioned	4
96	43	Timing and implications of aeolian sand accumulation in a alpine basin of Qilian Shan, NE Tibetan Plateau	2022	10.3389/feart.2022.939887	HB	12.5 ± 0.5	1
98	44	Shedding light on the timing of the largest Late Quaternary transgression of the Caspian Sea	2022	10.1016/j.quageo.2022.101378	Added 0.94Gy/ka onto the quartz dose rate	not mentioned	4
99	45	Investigating the loess-palaeosol sequence of Bahlingen-Schonenberg (Kaiserstuhl), southwestern Germany, using a multi-methodological approach	2022	10.5194/egqsj-71-145-2022	not mentioned	not mentioned	4
100	46	Testing the accuracy of OSL and pIR IRSL dating of young geoarchaeological sediments in coastal Peru	2022	10.1016/j.quageo.2022.101382	HB	12.5 ± 0.5	1
101	47	Luminescence chronology for identifying depositional sequences in an uplifted coast since the Middle Pleistocene, eastern Japan	2022	10.3389/feart.2022.967572	not mentioned	not mentioned	4
102	48	Coarse-grained K-rich feldspar and fine-grained polymineral IRSL dating of loess-palaeosol from the Chinese Loess Plateau: A comparison	2022	10.1016/j.quageo.2022.101379	used a „typical environmental dose rate“	not mentioned	4
103	49	Redating the Zhuwobu Paleolithic site in the Huailai basin, North China, using the MET-pIRIR procedure on K-feldspars	2022	10.3389/feart.2022.932834	R (same region)	12 ± 1	1
104	50	Chronology of Last Glacial Maximum sediments in the coast of Fujian, South China	2022	10.1016/j.margeo.2022.106884	HB	12.5 ± 0.5	1
105	51	Westerlies-Monsoon interaction drives out-of-phase precipitation and asynchronous lake level changes between Central and East Asia over the last millennium	2022	10.1016/j.catena.2022.106568	HB + HH	12.5 ± 0.5	1
106	52	Unexpectedly old luminescence ages as an indicator of the origin of the upper Volga River valley sediments	2022	10.1016/j.quageo.2022.101381	not mentioned	not mentioned	4
107	53	The last 30,000 to 700,000 years ago: Unravelling the timing of human settlement for the Palaeolithic site of Kozarnika	2022	10.1016/j.quascirev.2022.107645	HB	12.5 ± 0.5	1
110	54	A simplified multiple aliquot regenerative dose protocol to extend the dating limit of K-feldspar pIRIR signal	2022	10.1016/j.radmeas.2022.106827	measured mineral composition with XRF attachment and calculated the K-content based on proportion of K-feldspar and a K-content of 14% for the endmember	12.2 -12.5 (sample-wise)	2
112	55	Luminescence Dating and Bracketing Time of the Youngest Toba Tuff Deposits in the Quaternary Sediments of Purna Alluvial Basin, Central India	2022	10.1007/s12583-020-1357-z	ZL	13.5 ± 0.2	1
113	56	A refined chronology for the Middle and early Upper Paleolithic sequence of Riparo Mochi (Liguria, Italy)	2022	10.1016/j.jhevol.2022.103211	HB + HH	12.5 ± 0.5	1
116	57	Luminescence chronology of the Sankosh river terraces in the Assam- Bhutan foothills of the Himalayas: Implications to climate and tectonics	2022	10.1016/j.quageo.2022.101364	not mentioned	not mentioned	4
117	58	Rock and sediment luminescence dating of an ancient circular stone-walled enclosure at S?nneb?e, northern Scania, Sweden	2022	10.1016/j.quageo.2022.101340	added 0.94Gy/ka onto the quartz dose rate	not mentioned	4
120	59	San Quirce (Palencia, Spain): new chronologies for the Lower to Middle Palaeolithic transition of south-west Europe	2023	10.1002/jqs.3460	HB	12.5 ± 0.5	1
122	60	Getting the right age? Testing luminescence dating of both quartz and feldspars against independent age controls	2022	10.1016/j.quageo.2022.101366	La	12 ± 2	1
123	61	OSL Dating of Paleo-Shorelines at Dagze Co, Central Tibetan Plateau	2022	10.3389/feart.2022.940013	not mentioned	not mentioned	4
124	62	Late Holocene rupture history of the Ash Hill fault, Eastern California Shear Zone, and the potential for seismogenic strain transfer between nearby faults	2022	10.1002/esp.5432	not mentioned	not mentioned	4
125	63	Late Quaternary evolution of lower reaches of the Volga River (Raygorod section) based on luminescence dating	2022	10.1016/j.quageo.2022.101369	measured Riso XRF attachment	12.7 ± 0.1	2
129	64	Late Quaternary lake level record of Orog Nuur, southern Mongolia, revealed by optical dating of paleo-shorelines	2022	10.1016/j.quageo.2022.101370	HB + ZL	12.5 ± 0.5	1
131	65	On the earliest Acheulean in Britain: first dates and in-situ artefacts from the MIS 15 site of Fordwich (Kent, UK)	2022	10.1098/rsos.211904	HB	12.5 ± 0.5	1
134	66	Reconstructing the thermal structure of shallow crust in the Tono region using multi-OSL-thermometry of K-feldspar from deep borehole core	2022	10.1016/j.epsl.2022.117607	HB	12.5%	1
135	67	A method to evaluate the degree of bleaching of IRSL signals in feldspar: The 3ET method	2022	10.1016/j.quageo.2022.101346	not mentioned	not mentioned	4
138	68	Testing the natural limits of infrared radiofluorescence dating of the Luochuan loess-palaeosol sequence, Chinese Loess Plateau	2022	10.1016/j.radmeas.2022.106797	HB	12.5 ± 0.5	1
139	69	OSL dating of coastal sand dunes in southeastern China provides new insights into the relationship between aeolian activity and eustatic sea-level fluctuations	2022	10.1016/j.palaeo.2022.111082	HH + ZL + L2	13 ± 1	1
140	70	Testing the potential of using coarse-grain feldspars for post-IR IRSL dating of calcium sulphate-wedge growth in the Atacama Desert	2022	10.1016/j.quageo.2022.101341	SEM-EDX measurement SG	3.9 ± 1	2
144	71	A Middle Pleistocene Denisovan molar from the Annamite Chain of northern Laos	2022	10.1038/s41467-022-29923-z	HB + HH	12.5 ± 05	1
145	72	Luminescence dating of the Huliu River terraces in the Nihewan Basin, North China	2022	10.1016/j.quageo.2022.101316	R + G (same region as R)	12 ± 1	1
148	73	Luminescence chronology of fossiliferous fluvial sediments along the middle Atbara River, Sudan	2022	10.1016/j.quageo.2022.101312	HB	12.5 ± 0.5	1
149	74	Luminescence dating of shoreline sediments indicates a late deglacial lake-level rise of Selin Co on the central Tibetan Plateau	2022	10.1016/j.quageo.2022.101313	HB	12.5 ± 0.5	1
150	75	Timing of Sedimentary Evolution and Transgressions in the Bohai Sea During the Last ∼200 ka: Constraints from Luminescence Dating of a Core from the Yellow River Delta	2022	10.3389/feart.2022.865761	HB	12.5 ± 0.5	1
152	76	Age comparison by luminescence using quartz and feldspar on core HPQK01 from the Pearl River delta in China	2022	10.1016/j.quageo.2022.101320	HB	12.5 ± 0.5	1
153	77	Luminescence chronology of loess-palaeosol deposits in the Central Shandong Mountains region: Provenances and paleoclimate implications	2022	10.1016/j.quageo.2022.101296	HB + M2	12.5 ± 0.5	1
155	78	Luminescence dating reveals a rapid response to climate change of fluvial terrace formation along the Ani River, northeastern Japan, during the last glacial period	2022	10.1016/j.quageo.2022.101307	HB	12.5 ± 0.5	1
156	79	Luminescence characteristics of coastal sediments in Langhovde, East Antarctica	2022	10.1016/j.quageo.2022.101298	not mentioned	not mentioned	4
157	80	MET-IRSL used to track pre-depositional sediment transport history	2022	10.1016/j.quageo.2022.101294	not mentioned	not mentioned	4
158	81	Dating Neolithic rubble layers from Ba'ja and Basta sites in southern Jordan using luminescence	2022	10.1016/j.quageo.2022.101291	HB + HH	0.58 ± 0.03Gy/ka for 100-180um fraction	4
159	82	Luminescence dating of a megaflood event on a terrace of the Jinsha River, China	2022	10.1016/j.quageo.2022.101303	FL	13 ± 1	1
160	83	Luminescence dating of the late Quaternary sediments in Hangzhou Bay, China	2022	10.1016/j.quageo.2022.101302	not mentioned	0.54 ± 0.1 & 0.38 ± 0.06Gy/ka	4
161	84	Multi-method pIRIR dating of sedimentary sequences at the southern edge of the Gurbantunggut Desert, NW China and its palaeoenvironmental implications	2022	10.1016/j.quageo.2022.101300	HB	12.5 ± 1	1
162	85	Lake level changes of Nam Co since 25 ka as revealed by OSL dating of paleo-shorelines	2022	10.1016/j.quageo.2022.101274	not mentioned	not mentioned	4
164	86	Luminescence dating of Holocene sediment cores from a wave-dominated and mountainous river delta in central Vietnam	2022	10.1016/j.quageo.2022.101277	not mentioned	not mentioned	4
165	87	Revised temporal and morphostratigraphic context for Clark Quarry: A late-Pleistocene, fluvially-reworked, Atlantic coast backbarrier deposit	2022	10.1016/j.quascirev.2022.107496	HB	12.5%	1
168	88	Illuminating past river incision, sediment source and pathways using luminescence signals of individual feldspar grains (Rangitikei River, New Zealand)	2022	10.1002/esp.5357	S	10 ± 2	1
169	89	Sedimentary evolution of a foreland basin from the northeastern Qilian Mountains based on the integration of geomorphological and luminescence dating of alluvial conglomerates and fluvial terrace sediments	2022	10.1016/j.quageo.2022.101268	HB	12.5 ± 0.5	1
172	90	Timing of Holocene lake highstands around Dawa Co in inner Tibetan Plateau: Comparison of quartz and feldspar luminescence dating with radiocarbon age	2022	10.1016/j.quageo.2022.101267	HB	12.5 ± 0.5	1
174	91	Palaeoenvironmental changes and their chronology during the latter half of MIS 5 on the south-eastern coast of the Gulf of Finland	2022	10.1016/j.quaint.2021.10.016	HB + HH + M	0.7Gy/ka	4
175	92	Chronology of Four Climbing Dune Outcrops on the Atlantic Coast of Galicia (NW Spain) Linked to the Sea Level Fall during the MIS6 and MIS4 Isotopic Stages	2022	10.3390/jmse10030312	HB	12.5 ± 0.5	1
177	93	From glacial erosion to basin overfill: a 240 m-thick overdeepening fill sequence in Bern, Switzerland	2022	10.5194/sd-30-17-2022	not mentioned	not mentioned	4
178	94	Incision and aggradation phases of the Amazon River in central-eastern Amazonia during the late Neogene and Quaternary	2022	10.1016/j.geomorph.2021.108073	not mentioned	12.5%	4
181	95	Luminescence dating of a sedimentary sequence in the eastern North Yellow Sea	2022	10.1016/j.marpetgeo.2022.105543	HL	12.5 ± 0.5	1
183	96	Sea-level changes in the Bohai Sea, northern China, constrained by coastal loess accumulation over the past 200 ka	2022	10.1016/j.quascirev.2021.107368	HB	12.5 ± 0.5	1
187	97	Microcontinent Breakup and Links to Possible Plate Boundary Reorganization in the Northern Gulf of California, Mexico	2022	10.1029/2021TC006933	HB	not mentioned	4
188	98	A multimethod dating study of ancient permafrost, Batagay megaslump, east Siberia	2022	10.1017/qua.2021.27	not mentioned	0.53 ± 0.1 Gy/ka	4
190	99	Vegetation, glacier, and climate changes before the global last glacial maximum in the Isla Grande de Chiloe, southern Chile (42° S)	2022	10.1016/j.quascirev.2021.107301	HB	12.5 ± 0.5	1
193	100	Dating of the late Quaternary high lake levels in the Jilantai area, northwestern China, using optical luminescence of quartz and K-feldspar	2022	10.1016/j.jseaes.2021.105024	HB + HH	12.5 ± 0.5	1
195	101	A tale of two signals: Global and local influences on the Late Pleistocene loess sequences in Bulgarian Lower Danube	2021	10.1016/j.quascirev.2021.107264	HB	12.5 ± 0.5	1
196	102	Investigating the resetting of IRSL signals in beach cobbles and their potential for rock surface dating of marine terraces in Northern Chile	2022	10.1016/j.margeo.2021.106692	S	10 ± 2	1
199	103	Luminescence dating of Youfangbei early late Pleistocene site, Nihewan Basin, North China	2021	10.1017/qua.2021.19	HB + ZL	12.5 ± 0.5	1
202	104	Luminescence thermochronometry of feldspar minerals: Optimisation of measurement conditions for the derivation of thermal kinetic parameters using isothermal holding experiments	2022	10.1016/j.quageo.2021.101240	not mentioned	12.5 ± 0.5	4
204	105	New Data on the Chronostratigraphy of the Upper Pleistocene Loess-Soil Series in Southwestern Siberia	2021	10.1134/S1028334X21100202	not mentioned	not mentioned	4
205	106	The close-space luminescence dated loess record from SW Junggar Basin indicates persistent aridity during the last glacial-interglacial cycle in lowlands of Central Asia	2021	10.1016/j.palaeo.2021.110664	HB	12.5 ± 0.5	1
208	107	Planform change of the Rio Chubut (-42°S,-70°W, Argentina) in re-sponse to climate drivers in the southern Andes	2021	10.1016/j.geomorph.2021.107924	S	10 ± 2	1
211	108	The Transport History of Alluvial Fan Sediment Inferred From Multiple Geochronometers	2021	10.1029/2021JF006096	HB	12.5 ± 0.5	1
215	109	Holocene Depositional History Inferred From Single-Grain Luminescence Ages in Southern California, North America	2021	10.1029/2021GL092774	HB + S + SP	10-12.5 for test caalculations but assumed 12.5 ± 0.5 for their study since 10-12.5 gave statistically the same results	1
217	110	Optically stimulated luminescence dating supports pre-Eemian age for glacial ice on the Lomonosov Ridge off the East Siberian continental shelf	2021	10.1016/j.quascirev.2021.107082	HB	12.5 ± 0.5	1
218	111	Late Pleistocene-Holocene Slip Rates in the Northwestern Zagros Mountains (Kurdistan Region of Iraq) Derived From Luminescence Dating of River Terraces and Structural Modeling	2021	10.1029/2020TC006565	HB	12.5 ± 0.5	1
221	112	Establishing a pIRIR procedure for De determination of composite mineral grains from volcanic terranes: A case study of sediments from Liang Bua, Indonesia	2021	10.1016/j.quageo.2021.101181	QUEM EDS	grain specifc	2
222	113	Late Pleistocene-Holocene pedogenesis and palaeoclimate in western Asia from palaeosols of the Central Iranian Plateau	2022	10.1111/bor.12541	HB	12.5 ± 0.5	1
224	114	Luminescence chronology for the Paleolithic site of Xinmiaozhuang Locality 1 (XMZ1) in the Nihewan Basin, northern China, and its paleoenvironmental and archaeological implications	2021	10.1016/j.jhevol.2021.103033	R (same region) + G	12 ± 1	1
225	115	Hominin occupation of the Tibetan Plateau during the Last Interglacial Complex	2021	10.1016/j.quascirev.2021.107047	HB + HH	12.5 ± 0.5	1
234	116	Exploring possible links between Quaternary aggradation in the Upper Rhine Graben and the glaciation history of northern Switzerland	2021	10.1007/s00531-021-02043-7	HB	12.5 ± 1	1
235	117	The Oyambre coastal terrace: a detailed sedimentary record of the Last Interglacial Stage in northern Iberia (Cantabrian coast, Spain)	2021	10.1002/jqs.3317	XRF average	12.2 ± 0.3	2
236	118	Holocene lake-level fluctuations of Selin Co on the central Tibetan plateau: Regulated by monsoonal precipitation or meltwater?	2021	10.1016/j.quascirev.2021.106919	HB	12.5 ± 0.5	1
237	119	Composite grains from volcanic terranes: Internal dose rates of supposed 'potassium-rich' feldspar grains used for optical dating at Liang Bua, Indonesia	2021	10.1016/j.quageo.2021.101182	QUEM EDS	grain specifc	2
244	120	Evidence for the age and timing of environmental change associated with a Lower Palaeolithic site within the Middle Pleistocene Reinsdorf sequence of the Schoningen coal mine, Germany	2021	10.1016/j.palaeo.2021.110309	HB	12.5%	1
246	121	A ∼130 ka terrestrial-marine interaction sedimentary history of the northern Jiangsu coastal plain in China	2021	10.1016/j.margeo.2021.106455	HB	12.5 ± 0.5	1
247	122	Synthesized luminescence ages of palaeo-beach ridges in Krishna-Godavari twin delta plain, east coast of India	2021	10.1016/j.quageo.2020.101145	HB	12.5 ± 0.5	1
248	123	Reconstructing the incision of the Lancang River (Upper Mekong) in southeastern Tibet below its prominent knickzone using fluvial terraces and transient tributary profiles	2021	10.1016/j.geomorph.2020.107551	not mentioned	not mentioned	4
249	124	Ancient DNA and multimethod dating confirm the late arrival of anatomically modern humans in southern China	2021	10.1073/pnas.2019158118	not mentioned	12.5 ± 0.5	4
252	125	A comparison of polymineral and K-feldspar post-infrared infrared stimulated luminescence ages of loess from Franconia, southern Germany	2021	10.5194/egqsj-70-53-2021	HB	12.5 ± 0.5	1
253	126	Late Quaternary coastal uplift of southwestern Sicily, central Mediterranean sea	2021	10.1016/j.quascirev.2021.106812	HB	12.5 ± 0.5	1
255	127	Calibration of a QEM-EDS system for rapid determination of potassium concentrations of feldspar grains used in optical dating	2021	10.1016/j.quageo.2020.101123	QUEM EDS	grain specifc	2
257	128	Chronological Assessment of the Balta Alba Kurgan Loess-Paleosol Section (Romania) - A Comparative Study on Different Dating Methods for a Robust and Precise Age Model	2021	10.3389/feart.2020.598448	HB	12.5 ± 0.5	1
259	129	New dates of a Northern Italian loess deposit (Monte Orfano, Southern pre-Alps, Brescia)	2021	10.1007/s11368-020-02860-4	HB	12.0 ± 0.5	1
261	130	Comparison of Equivalent Doses Obtained with Various post-IR IRSL Dating Protocols of K-Feldspar	2021	10.2478/geochr-2020-0010	HB + ZL	13 ± 1	1
263	131	High Resolution Quartz OSL and K-feldspar post-IR IRSL Dating of Loess in the Central Shandong Mountains (Eastern China)	2021	10.1515/geochr-2015-0113	HB	12.5 ± 0.5	1
264	132	Timing of Holocene Lake Highstand in Jinchang Paleolake from the Northeast Tibetan Plateau Foreland	2021	10.2478/geochr-2020-0004	HH	12.5 ± 0.5	1
265	133	The Bleaching of Different K-Feldspar pIRIR Signals of Source Materials of Lacustrine Sediment - A Case Study from Bosten Lake Basin in Arid Central Asia	2021	10.2478/geochr-2020-0013	HB	12.5 ± 0.5	1
266	134	Luminescence Dating of Late Pleistocene Lacustrine Deposits in Badain Jaran Desert, North China	2021	10.2478/geochr-2020-0032	HB	12.5 ± 0.5	1
267	135	LUMINESCENCE DATING OF LACUSTRINE SEDIMENTS FROM CUOE LAKE ON THE CENTRAL TIBETAN PLATEAU	2021	10.2478/geochr-2020-0002	HB	12.5 ± 0.5	1
268	136	Post-IR Irsl Chronology of Paleo-Lacustrine Sediments from Yardangs in the Qaidam Basin, NE Tibetan Plateau	2021	10.2478/geochr-2020-0016	HB	12.5 ± 0.5	1
269	137	Multi-Method Luminescence Dating of Old Fluvial Sediments from Northern Tian Shan, China	2021	10.2478/geochr-2020-0014	not mentioned	12.5 ± 0.5	4
270	138	Applicability of OSL Dating to Fine-Grained Fluvial Deposits in the Mekong River Floodplain, Cambodia	2021	10.2478/geochr-2020-0006	HB	12.5 ± 0.5	1
271	139	Residual Dose of K-Feldspar post-IR Irsl of Beach-Shoreface Sands at Kujukuri, Eastern Japan	2021	10.2478/geochr-2020-0036	HB	12.5 ± 0.5	1
273	140	Luminescence Dating of Nuomuhong Culture Ceramics at Talitaliha Site on the Northeastern Qinghai-Tibetan Plateau	2021	10.2478/geochr-2020-0034	NAA + ICP-MS	not mentioned	2
279	141	Post-IR IRSL dating the oldest (?) river terrace sediments in the Polish Outer Carpathians: Insights into the landscape evolution	2020	10.1016/j.geomorph.2020.107436	HB	12.5 ± 0.5	1
280	142	Chronology of the marine terraces of the Crotone Peninsula (Calabria, southern Italy) by means of infrared-stimulated luminescence (IRSL)	2020	10.1016/j.marpetgeo.2020.104645	not mentioned	not mentioned	4
281	143	First luminescence chronology of late Holocene deposits of the tropical Atrato Delta, Colombia	2020	10.1016/j.jsames.2020.102813	not mentioned	not mentioned	4
282	144	Loess depositional dynamics and paleoclimatic changes in the Yili Basin, Central Asia, over the past 250 ka	2020	10.1016/j.catena.2020.104881	HB	12.5 ± 0.5	1
284	145	Revisiting growth and decline of late Quaternary mega-lakes across the south-central Tibetan Plateau	2020	10.1016/j.quascirev.2020.106475	HB + HH	12.5 ± 0.5	1
288	146	First reliable chronology for the Early Khvalynian Caspian Sea transgression in the Lower Volga River valley	2021	10.1111/bor.12478	HB	12.5 ± 0.5	1
291	147	An alpine meadow soil chronology based on OSL and radiocarbon dating, Qinghai Lake, northeastern Tibetan Plateau	2020	10.1016/j.quaint.2020.05.044	not mentioned	not mentioned	4
292	148	OSL chronology of socio-ecological systems during the mid-Holocene in the eastern coast of the Sultanate of Oman (Arabian Peninsula)	2020	10.1016/j.jasrep.2020.102465	not mentioned	10 ± 1	4
293	149	A comparison of multiple luminescence chronometers at Voordrag, South Africa	2020	10.1016/j.quageo.2020.101094	SS-counting	10.4 ± 0.4-15.1 ± 1.1	2
296	150	Sedimentary evidence and luminescence and ESR dating of Early Pleistocene high lake levels of Megalake Tengger, northwestern China	2020	10.1002/jqs.3246	HB	12.5 ± 0.5	1
302	151	Luminescence dating of reticulated red clay buried in Lanshanmiao Paleolithic site in Zhejiang Province, southern China	2020	10.1007/s11442-020-1791-y	HB	not mentioned	4
303	152	Refined chronostratigraphy of a late Quaternary Sedimentary sequence from the Yangtze River delta based on K-feldspar luminescence dating	2020	10.1016/j.margeo.2020.106271	HB	12.5 ± 0.5	1
304	153	Preservation of the last aggradation phase in climate-driven terraces: Evidence from Late Quaternary reach-specific fluvial dynamics of the Allier River (France)	2020	10.1002/esp.4972	S	not mentioned	4
306	154	Testing the potential of K-feldspar pIR-IRSL and quartz ESR for dating coastal alluvial fan complexes in arid environments	2020	10.1016/j.quaint.2020.03.037	HB	12.5 ± 0.5	1
307	155	The Late Pleistocene palaeoenvironmental evolution in Northern Eurasia through the prism of the mollusc shell-based ESR dating evidence	2020	10.1016/j.quaint.2019.05.031	HB + HH	not mentioned	4
308	156	Exploring the use of a low temperature preheat in IRSL dating of feldspar in Beringian archaeological contexts	2020	10.1016/j.radmeas.2020.106387	S	10 ± 2	1
309	157	Exploring complexity in luminescence dating of quartz and feldspars at the Middle Stone Age site of Mwulu's cave (Limpopo, South Africa)	2020	10.1016/j.quageo.2020.101092	S (but added +-1 to be more conservative)	10 ± 3	1
310	158	Do Bayesian methods lead to more precise chronologies? 'BayLum' and a first OSL-based chronology for the Palaeolithic open-air site of Mirak (Iran)	2020	10.1016/j.quageo.2020.101082	HB	12.5 ± 0.5	1
313	159	Pleistocene lakes and paleohydrologic environments of the Tecopa basin, California: Constraints on the drainage integration of the Amargosa River	2020	10.1130/B35282.1	not mentioned	not mentioned	4
315	160	Luminescence chronology of the northeastern Bulgarian loess-paleosol sequences (Viatovo and Kaolinovo)	2020	10.1016/j.quaint.2019.04.020	HB	12.5 ± 0.5	1
316	161	A Top-to-Bottom Luminescence-Based Chronology for the Post-LGM Regression of a Great Basin Pluvial Lake	2020	10.3390/quat3020011	measured with SEM-EDX + applied average of 18 measured grains to everything	10.7 ± 1.4	2
318	162	Testing quartz and feldspar luminescence dating to determine earthquake and tsunami recurrence in the area of the giant 1960 Chile earthquake	2020	10.1016/j.quageo.2020.101080	HB	12.5 ± 0.5	1
320	163	The suitability of a low temperature post-IR IRSL signal for dating alluvial and colluvial cut and fill sequences in the Great Karoo, South Africa	2020	10.1016/j.quageo.2020.101064	HB + HH	12.5 ± 0.5	1
322	164	Paleoclimatic changes and modulation of East Asian summer monsoon by high-latitude forcing over the last 130,000 years as revealed by independently dated loess-paleosol sequences on the NE Tibetan Plateau	2020	10.1016/j.quascirev.2020.106283	M + HB	12.5 ± 0.5	1
325	165	Indirect dating of an olive tree planting event using luminescence of the sediments lying beneath the roots of the tree: a pilot study in the south-western part of Anatolia, Turkey	2020	10.1002/jqs.3212	HB	not mentioned	4
329	166	Historical settlement abandonment in the middle Hexi Corridor linked to human-induced desertification	2020	10.1016/j.palaeo.2020.109634	HH	12.5 ± 0.5	1
330	167	Age and significance of late Pleistocene Lithophyllum byssoides intertidal algal ridge, NW Sardinia, Italy	2020	10.1016/j.sedgeo.2020.105618	HB	12.5 ± 0.5	1
333	168	Circumvention of anomalous fading in feldspar luminescence dating using Post-Isothermal IRSL	2020	10.1016/j.quageo.2020.101062	not mentioned	12.5 ± 0.05	4
334	169	Testing the upper limit of luminescence dating based on standardised growth curves for MET-pIRIR signals of K-feldspar grains from northern China	2020	10.1016/j.quageo.2020.101063	R (based on measurements of R in the same region)	12 ± 1	1
336	170	The Middle Pleistocene fluvial sequence at Uichteritz, central Germany: Chronological framework, paleoenvironmental history and early human presence during MIS 11	2020	10.1016/j.geomorph.2019.107016	measured microprobe (average per sample from 20 grains)	12.04 ± 0.13-12.24 ± 0.14	2
338	171	Comparison of single-aliquot and single-grain MET-pIRIR De results for potassium feldspar samples from the Nihewan Basin, northen China	2020	10.1016/j.quageo.2019.101040	R (same region)	12 ± 1	1
344	172	Human occupation of northern India spans the Toba super-eruption ∼74,000 years ago	2020	10.1038/s41467-020-14668-4	HB + HH + ZL	13 ± 1	1
347	173	Differential ice volume and orbital modulation of Quaternary moisture patterns between Central and East Asia	2020	10.1016/j.epsl.2019.115901	HB	12.5 ± 0.5	1
349	174	AGE OF SEDIMENTS ON DANUBE TERRACES OF THE PEST PLAIN (HUNGARY) BASED ON OPTICALLY STIMULATED LUMINESCENCE DATING OF QUARTZ AND FELDSPAR	2020	10.2478/geochr-2020-0021	HB	12.5 ± 0.5	1
353	175	Identification of humid periods in the Atacama Desert through hillslope activity established by infrared stimulated luminescence (IRSL) dating	2020	10.1016/j.gloplacha.2019.103086	not mentioned	12.5 ± 0.5	4
356	176	Timing and development of sand dunes in the Golestan Province, northern Iran-Implications for the Late-Pleistocene history of the Caspian Sea	2019	10.1016/j.aeolia.2019.07.004	HB	12.5 ± 0.5	1
361	177	Optical dating reveals that the height of Earth's tallest megadunes in the Badain Jaran Desert of NW China is increasing	2019	10.1016/j.jseaes.2019.104025	HB + ZL + L2	12.5 ± 0.5	1
364	178	Earliest occupation of the Central Aegean (Naxos), Greece: Implications for hominin and Homo sapiens' behavior and dispersals	2019	10.1126/sciadv.aax0997	HB	12.5 ± 0.5	1
365	179	Constraining the transgression history in the Bohai Coast China since the Middle Pleistocene by luminescence dating	2019	10.1016/j.margeo.2019.105980	HB	12.5 ± 0.5	1
371	180	New Chronology and Stratigraphy for Kathu Pan 6, South Africa	2019	10.1007/s41982-019-00031-7	HB + S	12 ± 0.5 (because 12.5 is not showing the desired results!)	1
374	181	Optically stimulated luminescence dating of late Quaternary loess deposits in the coastal region of North China: Provenance and paleoclimatic implications	2019	10.1016/j.quascirev.2019.06.022	ZL + L2	13 ± 1	1
376	182	Luminescence dating of a transitional Chalcolithic/Bronze Age site in Jordan	2019	10.1007/s12520-019-00813-8	HB	12.5 ± 0.5	1
377	183	Luminescence dating of sediments from central Atacama Desert, northern Chile	2019	10.1016/j.quageo.2019.05.001	HB	12.5 ± 0.5	1
378	184	Comparing the accuracy and precision of luminescence ages for partially-bleached sediments using single grains of K-feldspar and quartz	2019	10.1016/j.quageo.2019.101007	measured with Riso attachment for aliquots and with Bruker u-XRF for SG in SG discs	grain specific values	2
379	185	Bioturbation and erosion rates along the soil-hillslope conveyor belt, part 1: Insights from single-grain feldspar luminescence	2019	10.1002/esp.4628	S	not mentioned	1
382	186	Using post-IR IRSL and OSL to date young (< 200 yrs) dryland aeolian dune deposits	2019	10.1016/j.radmeas.2019.106131	not mentioned but mention the Dint they used	not mentioned	4
383	187	Luminescence chronology and palaeoenvironmental significance of limnic relics from the Badain Jaran Desert, northern China	2019	10.1016/j.jseaes.2019.03.024	HB	12.5 ± 0.5	1
384	188	Landscape dynamics revealed by luminescence signals of feldspars from fluvial terraces	2019	10.1038/s41598-019-44533-4	HB + HH	12.5 ± 0.5	1
385	189	Luminescence dating of buried cobble surfaces from sandy beach ridges: a case study from Denmark	2019	10.1111/bor.12402	HB	12.5 ± 0.5	1
386	190	Optical dating of Holocene paleosol development and climate changes in the Yili Basin, arid central Asia	2019	10.1177/0959683619831432	HB + ZL	12.5 ± 0.5	1
390	191	Fluvial response to rising levels of the Black Sea and to climate changes during the Holocene: Luminescence geochronology of the Sakarya terraces	2019	10.1177/0959683619831428	not mentioned	not mentioned	4
395	192	Multi-millennial scale climate variability during MIS 3 and MIS 2 inferred from luminescence dating of coastal sand dunes and buried paleosol sequences in central Chile, 32°S	2019	10.1002/jqs.3092	HB	12.5 ± 0.5	1
404	193	Luminescence chronology of the Palaeolithic-Neolithic transition in the Yujiagou site at the Nihewan Basin, northern China	2019	10.1002/jqs.3086	SEM measurement	12 ± 1 (~11-~13)	2
406	194	Variability in the thermal stability of OSL signal of single-grain quartz from the Nihewan Basin, North China	2019	10.1016/j.quageo.2018.04.011	not mentioned	not mentioned	4
410	195	Establishing a high-resolution luminescence chronology for the Zhenbeitai sand-loess section at Yulin, North-Central China	2019	10.1016/j.quageo.2018.03.013	HB	12.5 ± 0.5	1
411	196	Testing post-IR IRSL luminescence dating methods in the southwest Mojave Desert, California, USA	2019	10.1016/j.quageo.2018.05.006	HB	12.5 ± 0.5	1
412	197	Constraining the timing of palaeosol development in Iranian arid environments using OSL dating	2019	10.1016/j.quageo.2018.04.006	HB	12.5 ± 0.5	1
414	198	Late Quaternary OSL chronologies from the Qinghai Lake (NE Tibetan Plateau): Inter-comparison of quartz and K-feldspar ages to assess the pre-depositional bleaching	2019	10.1016/j.quageo.2018.05.003	HB (but also measured 12.21+-0.03)	12.5 ± 0.5	3
415	199	IRSL dating of rocks and sediments from desert geoglyphs in coastal Peru	2019	10.1016/j.quageo.2018.07.009	SEM EDS on 33 grains with 1.24 to 14.27 % K and average by weight of 5.53+-3.64 % K	6 ± 3	2
419	200	pIRIR and IR-RF dating of archaeological deposits at Badahlin and Gu Myaung Caves - First luminescence ages for Myanmar	2019	10.1016/j.quageo.2018.01.001	S	10 ± 2	1
420	201	Dating the palaeolithic footprints of 'Le Rozel' (Normandy, France)	2019	10.1016/j.quageo.2017.12.005	not mentioned	10 ± 2	4
421	202	Climate change in arid central Asia since MIS 2 revealed from a loess sequence in Yili Basin, Xinjiang, China	2019	10.1016/j.quaint.2018.02.032	HB + HH	12.5 ± 0.5	1
422	203	Age of Obsidian Butte in Imperial County, California, Through Infrared Stimulated Luminescence Dating of Potassium Feldspar from Tuffaceous Sediment	2019	10.1080/1947461X.2019.1581678	ICP-OES	12	2
425	204	A luminescence-based chronology for the Harletz loess sequence, Bulgaria	2019	10.1111/bor.12348	HB	12.5 ± 0.5	1
427	205	Optical dating of K-feldspar grains from Middle Pleistocene lacustrine sediment at Marathousa 1 (Greece)	2018	10.1016/j.quaint.2018.06.029	HB	12 ± 1	1
434	206	Methodological studies on integration time interval's selection for the luminescence ages using quartz and feldspar minerals; sediments collected from Sakarya, Turkey	2018	10.1016/j.radmeas.2018.06.024	not mentioned	0.55-0.71 Gy/ka	4
435	207	On the relationship between K concentration, grain size and dose in feldspar	2018	10.1016/j.radmeas.2018.06.003	measured XRF	0-16	2
437	208	Testing the reliability of fading correction methods for feldspar IRSL dating: A comparison between natural and simulated-natural dose response curves	2018	10.1016/j.radmeas.2018.06.025	HB	12.5 ± 0.5	1
451	209	First post-IR IRSL dating results of Quaternary deposits from Bilogora (NE Croatia): Implications for the Pleistocene relative uplift and incision rates in the area	2018	10.1016/j.quaint.2017.08.049	HB	12.5 ± 0.5	1
453	210	Luminescence dating of pre-Eemian (pre-MIS 5e) fluvial terraces in Northern Bavaria (Germany) - Benefits and limitations of applying a pIRIR225-approach	2018	10.1016/j.geomorph.2018.08.009	HB	12.5 ± 0.5	1
454	211	The MIS5 Pietersburg at '28' Bushman Rock Shelter, Limpopo Province, South Africa	2018	10.1371/journal.pone.0202853	measured SEM-EDX on individual grains -> measurements might be influenced by silicon oil -> 12.5 too high and thus being a "maximum" value HH + HB	12.5 ± 2	3
456	212	Testing the accuracy of feldspar single grains to date late Holocene cyclone and tsunami deposits	2018	10.1016/j.quageo.2018.09.001	ß-counting + S	10 ± 2 (ß-counter results were in unity with 10 ± 2)	3
458	213	Deciphering long-term coastal dynamics using IR-RF and ESR dating: a case study from Medoc, south-west France	2018	10.1016/j.quageo.2018.09.005	EDX analysis (large variations but mean close to HB) + HB	12 ± 2 (measured 12.8 ± 3.6 therefore put a larger error on HB and for some reasin dismissed the 0.5 after the 12)	3
459	214	The spatial extent of the East Asian summer monsoon in arid NW China during the Holocene and Last Interglaciation	2018	10.1016/j.gloplacha.2018.07.008	HB	12.5 ± 0.5	1
461	215	The Holocene paleo-environmental history of the Gangkou River estuary, Hengchun Peninsula, Taiwan	2018	10.3319/TAO.2018.05.07.01	HB	12.5 ± 0.5	1
462	216	Hebei loess section in the Anyemaqen Mountains, northeast Tibetan Plateau: a high-resolution luminescence chronology	2018	10.1111/bor.12321	HB	12.5 ± 0.5	1
464	217	Chronology and formation processes of the Middle to Upper Palaeolithic deposits of Ifri n'Ammar using multi-method luminescence dating and micromorphology	2018	10.1016/j.quaint.2017.10.043	HB	12.5 ± 0.5	1
465	218	Thermoluminescence of feldspar as a multi-thermochronometer to constrain the temporal variation of rock exhumation in the recent past	2018	10.1016/j.epsl.2018.04.030	took measured values from https://doi.org/10.1126/science.aaf2637	12.33 ± 0.3-14.99 ± 0.19 (from https://doi.org/10.1126/science.aaf2637)	1
467	219	Quartz OSL and K-feldspar post-IR IRSL dating of loess in the Huangshui river valley, northeastern Tibetan plateau	2018	10.1016/j.aeolia.2018.04.002	HB	12.5 ± 0.5	1
468	220	Testing the applicability of a partial bleach method for post-IR IRSL dating of Holocene-aged K-feldspar samples	2018	10.1016/j.quageo.2018.04.003	HB + ZL	13 ± 1	1
470	221	Orbital scale lake evolution in the Ejina Basin, central Gobi Desert, China revealed by K-feldspar luminescence dating of paleolake shoreline features	2018	10.1016/j.quaint.2018.03.040	HB	12.5 ± 0.5	1
471	222	A Tianshan Mountains loess-paleosol sequence indicates anti-phase climatic variations in arid central Asia and in East Asia	2018	10.1016/j.epsl.2018.04.052	HB	12.5 ± 0.5	1
476	223	Pedo-sedimentary constituents as paleoenvironmental proxies in the Sudano-Sahelian belt during the Late Quaternary (southwestern Chad Basin)	2018	10.1016/j.quascirev.2018.05.022	state they used the same values as https://doi.org/10.1016/j.quageo.2016.08.008 (no. 595 in this list; they measured individual grains on Superprobe)	12.65 ± 0.1	2
478	224	On the Holocene evolution of the Ayeyawady megadelta	2018	10.5194/esurf-6-451-2018	HB	12.5 ± 0.5	1
479	225	Luminescence dating of the Rissian type section in southern Germany as a base for correlation	2018	10.1016/j.quaint.2016.07.055	measured microprobe	13.37 ± 0.42 - 13.56 ± 0.2	2
480	226	Rhythmic Patterns of Coastal Formations as Signs of Past Climate Fluctuations on Uplifting Coasts of Estonia, the Baltic Sea	2018	10.2112/SI85-123.1	not mentioned	not mentioned	4
481	227	Neanderthal settlement in central Iberia: Geo-archaeological research in the Abrigo del Molino site, MIS 3 (Segovia, Iberian Peninsula)	2018	10.1016/j.quaint.2016.05.027	HB	12.5 ± 0.5	1
482	228	Fake age hiatus in a loess section revealed by OSL dating of calcrete nodules	2018	10.1016/j.jseaes.2017.11.016	HB + ZL	13 ± 1	1
483	229	Optical dating of eolian deposits since the last interglacial along the northern margin of the Chinese Loess Plateau	2018	10.1016/j.jseaes.2017.11.017	HB	12.5 ± 0.5	1
485	230	High resolution luminescence chronology for Xiashu Loess deposits of Southeastern China	2018	10.1016/j.jseaes.2017.11.027	HB	12.5 ± 0.5	1
486	231	Single-grain feldspar luminescence chronology of historical extreme wave event deposits recorded in a coastal lowland, Pacific coast of central Japan	2018	10.1016/j.quageo.2018.01.006	measurement ß counter (6.44+1.05) but used S ("brightest grains" argument)	10 ± 2	3
488	232	Resolving problematic luminescence chronologies for carbonate- and evaporite-rich sediments spanning multiple humid periods in the Jubbah Basin, Saudi Arabia	2018	10.1016/j.quageo.2017.06.002	HB	12.5 ± 0.5	1
490	233	The Age and Origin of Small Offsets at Van Matre Ranch along the San Andreas Fault in the Carrizo Plain, California	2018	10.1785/0120170162	HB	12.5 ± 0.5	1
491	234	Successful combination of electron spin resonance, luminescence and palaeomagnetic dating methods allows reconstruction of the Pleistocene evolution of the lower Moulouya river (NE Morocco)	2018	10.1016/j.quascirev.2017.11.008	HB	12.5 ± 0.5	1
494	235	Ice-volume-forced erosion of the Chinese Loess Plateau global Quaternary stratotype site	2018	10.1038/s41467-018-03329-2	HB	12.5 ± 0.5	1
497	236	Timing of lake-level changes for a deep last-glacial Lake Missoula: optical dating of the Garden Gulch area, Montana, USA	2018	10.1016/j.quascirev.2018.01.009	HB	12.5	1
499	237	Additional evidence for early modern human morphological diversity in Southeast Asia at Tam Pa Ling, Laos	2018	10.1016/j.quaint.2016.12.002	HB	13 ± 1	1
504	238	Quartz and K-feldspar luminescence dating of sedimentation in the North Bohai coastal area (NE China) since the late pleistocene	2018	10.1016/j.jseaes.2017.10.036	HB	12.5 ± 0.5	1
505	239	Luminescence geochronology and paleoenvironmental implications of coastal deposits of southeast Cyprus	2018	10.1007/s12520-016-0339-7	ICP-MS and SEM (?) unclear if averaged per sample or only 1 measurement	9.8-11 (one value per sample)	2
509	240	New age constraints for the Saalian glaciation in northern central Europe: Implications for the extent of ice sheets and related proglacial lake systems	2018	10.1016/j.quascirev.2017.11.029	HB	12.5 ± 0.5	1
510	241	A contribution to late Middle Paleolithic chronology of the Levant: New luminescence ages for the Atlit Railway Bridge site, Coastal Plain, Israel	2018	10.1016/j.quaint.2017.06.017	measured 10.5-11.1 % K but cite S (that grains with bright signal have K-concentrations of 12+-0.5 and those grains will dominate the aliquot)	12.0 ± 0.5	3
514	242	A multi-proxy palaeoenvironmental and geochronological reconstruction of the Saalian-Eemian-Weichselian succession at Klein Klutz Hoved, NE Germany	2018	10.1111/bor.12255	HB	12.5 ± 0.5	1
515	243	Timing of fluvial sedimentation in the Upper Rhine Graben since the Middle Pleistocene: constraints from quartz and feldspar luminescence dating	2018	10.1111/bor.12266	HB	12.5 ± 0.5	1
518	244	Chronology of desert margin in western India using improved luminescence dating protocols	2017	10.1007/s12040-017-0890-3	ZL	13 ± 0.5	1
520	245	Loess deposits in Beijing and their paleoclimatic implications during the last interglacial-glacial cycle	2017	10.1016/j.quascirev.2017.10.023	ZL + L2	13 ± 1	1
522	246	Post-IR IRSL290 dating of K-rich feldspar sand grains in a wind-dominated system on Sardinia	2017	10.1016/j.marpetgeo.2017.03.025	HB	12.5 ± 0.5	1
525	247	Late Holocene cliff-top dune evolution in the Hengchun Peninsula of Taiwan: Implications for palaeoenvironmental reconstruction	2017	10.1016/j.jseaes.2017.08.024	HB	12.5 ± 0.5	1
529	248	Getting a grip on soil reworking - Single-grain feldspar luminescence as a novel tool to quantify soil reworking rates	2017	10.1016/j.quageo.2017.07.002	S	10 ± 2	1
530	249	Using thermoluminescence signals from feldspars for low-temperature thermochronology	2017	10.1016/j.quageo.2017.07.006	HB	12.5 ± 0.5	1
535	250	Active thrust sheet deformation over multiple rupture cycles: A quantitative basis for relating terrace folds to fault slip rates	2017	10.1130/B31590.1	HB	12.5 ± 0.12	1
537	251	Pulsed IRSL: A stable and fast bleaching luminescence signal from feldspar for dating Quaternary sediments	2017	10.1016/j.quageo.2017.05.004	HB	12.5 ± 0.5	1
542	252	New data on the chronology of the Vale do Forno sedimentary sequence (Lower Tejo River terrace staircase) and its relevance as a fluvial archive of the Middle Pleistocene in western Iberia	2017	10.1016/j.quascirev.2016.11.001	HB	12.5 ± 0.5	1
545	253	Pleistocene high sea level stands in the Agadir area: Review of available chronological data	2017	10.1016/j.anthro.2017.03.010	HB	12.5 ± 0.5	1
547	254	Extending the record of lacustrine phases beyond the last interglacial for Lake Eyre in central Australia using luminescence dating	2017	10.1016/j.quascirev.2017.03.002	ZL	13 ± 1	1
550	255	The chronostratigraphy of the Haua Fteah cave (Cyrenaica, northeast Libya) - Optical dating of early human occupation during Marine Isotope Stages 4, 5 and 6	2017	10.1016/j.jhevol.2017.01.008	S	10 ± 2	1
551	256	TT-OSL and post-IR IRSL dating of the Dali Man site in central China	2017	10.1016/j.quaint.2015.05.027	not mentioned	12.5 ± 0.5	4
552	257	The luminescence dating chronology of a deep core from Bosten Lake ( NW China) in arid central Asia reveals lake evolution over the last 220 ka	2017	10.1111/bor.12209	HB	12.5 ± 0.5	1
553	258	Late Quaternary lake evolution in the Gaxun Nur basin, central Gobi Desert, China, based on quartz OSL and K-feldspar pIRIR dating of paleoshorelines	2017	10.1002/jqs.2928	HB	12.5 ± 0.5	1
556	259	Yedoma Ice Complex of the Buor Khaya Peninsula (southern Laptev Sea)	2017	10.5194/bg-14-1261-2017	not mentioned	not mentioned	4
557	260	Testing feldspar and quartz luminescence dating of sandy loess sediments from the Doroshivtsy site (Ukraine) against radiocarbon dating	2017	10.1016/j.quaint.2015.05.036	HB	12.5 ± 0.5	1
559	261	Optical dating of Holocene tidal deposits from the southwestern coast of the South Yellow Sea using different grain-size quartz fractions	2017	10.1016/j.jseaes.2016.12.036	HB	12.5 ± 0.5	1
563	262	Geochronological investigations using a combination of luminescence and cosmogenic nuclide burial dating of drill cores from the Vienna Basin	2017	10.1127/zdgg/2017/0081	HB	12.5 ± 0.5	1
566	263	An improved radio fluorescence single-aliquot regenerative dose protocol for K-feldspars	2017	10.1016/j.quageo.2016.11.004	HB	12.5 ± 0.5	1
567	264	Sandy beach ridges from Xingkai Lake (NE Asia): Timing and response to palaeoclimate	2017	10.1016/j.quaint.2015.11.009	ZL	12.5 ± 0.5	1
568	265	Between a rock and a soft place: Using optical ages to date ancient clam gardens on the Pacific Northwest	2017	10.1371/journal.pone.0171775	not mentioned	not mentioned	4
570	266	A fluvial terrace record of late Quaternary folding rate of the Anjihai anticline in the northern piedmont of Tian Shan, China	2017	10.1016/j.geomorph.2016.10.034	HB + ZL + L2	13 ± 1	1
572	267	Luminescence dating of glaciolacustrine silt in overdeepened basin fills beyond the last interglacial	2017	10.1016/j.quageo.2016.09.009	HB	12.5 ± 0.5	1
573	268	LUMINESCENCE DATING OF HOLOCENE BEACH-RIDGE SANDS ON THE YUMIGAHAMA PENINSULA, WESTERN JAPAN	2017	10.1515/geochr-2015-0076	HB	12.5 ± 0.5	1
576	269	POST-IR IRSL DATING OF K-FELDSPAR FROM LAST INTERGLACIAL MARINE TERRACE DEPOSITS ON THE KAMIKITA COASTAL PLAIN, NORTHEASTERN JAPAN	2017	10.1515/geochr-2015-0077	HB	12.5 ± 0.5	1
579	270	TESTING FELDSPAR LUMINESCENCE DATING OF YOUNG ARCHAEOLOGICAL HEATED MATERIALS USING POTSHARDS FROM PELLA (TELL TABQAT FAHL) IN THE JORDAN VALLEY	2017	10.1515/geochr-2015-0056	ß counter + conversion factors (https://doi.org/10.1016/j.radmeas.2006.12.007)	already converted dose rates no K values	2
580	271	QUARTZ OSL AND K-FELDSPAR post-IR IRSL DATING OF SAND ACCUMULATION IN THE LOWER LIAO PLAIN (LIAONING, NE CHINA)	2017	10.1515/geochr-2015-0051	HB	12.5 ± 0.5	1
584	272	Applying luminescence methodology to key sites of Alpine glaciations in Southern Germany	2016	10.1016/j.quaint.2015.11.023	HB	12.5 ± 0.5	1
585	273	Optical dating of loessic hillslope sediments constrains timing of prehistoric rockfalls, Christchurch, New Zealand	2016	10.1002/jqs.2895	HB	12.5 ± 0.5	1
586	274	Chronology and stratigraphy of the Magdalen Islands archipelago from the last glaciation to the early Holocene: new insights into the glacial and sea-level history of eastern Canada	2016	10.1111/bor.12179	not mentioned	not mentioned	4
587	275	A detailed post-IR IRSL dating study of the Niuyangzigou loess site in northeastern China	2016	10.1111/bor.12185	HB	12.5 ± 0.5	1
588	276	Constraining the chronology of Pleistocene glaciations on Svalbard: Kapp Ekholm re-visited	2016	10.1111/bor.12191	HB	12.5 ± 1	1
590	277	Internal U, Th and Rb concentrations of alkali-feldspar grains: Implications for luminescence dating	2016	10.1016/j.quageo.2016.05.002	S	10 ± 2	1
591	278	Reactivation of the Pleistocene trans-Arabian Wadi ad Dawasir fluvial system (Saudi Arabia) during the Holocene humid phase	2016	10.1016/j.geomorph.2016.07.013	HB	12.5 ± 0.5	1
594	279	Exploring IRSL50 fading variability in bedrock feldspars and implications for OSL thermochronometry	2016	10.1016/j.quageo.2016.08.004	measured XRF (0.2-4 %K) for subset of samples and HB + BL for one sample	1.9 ± 1.4 & 12.5 ± 1	3
595	280	Pedogenic carbonate nodules as soil time archives: Challenges and investigations related to OSL dating	2016	10.1016/j.quageo.2016.08.008	measured 187 grains on a superprobe	12.65 ± 0.1	2
596	281	Paleoenvironmental changes recorded in a luminescence dated loess/paleosol sequence from the Tianshan Mountains, arid central Asia, since the Penultimate Glaciation	2016	10.1016/j.epsl.2016.05.008	HB + M	12.5 ± 0.5	1
602	282	Holocene palaeosols and aeolian activities in the Umimmalissuaq valley, West Greenland	2016	10.1177/0959683616632885	not mentioned	12 ± 0.5	4
609	283	Multi-OSL-thermochronometry of feldspar	2016	10.1016/j.quageo.2016.01.004	measured with WDS on superprobe	14-15	2
610	284	Geomorphic evidences and chronology of multiple neotectonic events in a cratonic area: Results from the Gavilgarh Fault Zone, central India	2016	10.1016/j.tecto.2016.04.022	not mentioned	not mentioned	4
613	285	Luminescence ages for three 'Middle Palaeolithic' sites in the Nihewan Basin, northern China, and their archaeological and palaeoenvironmental implications	2016	10.1016/j.yqres.2016.03.002	HB + HH + ZL + L2	13 ± 1	1
614	286	Revised stratigraphy and chronology for Homo floresiensis at Liang Bua in Indonesia	2016	10.1038/nature17179	EDS + WDS measurements of 28 grains	12 ± 1	2
617	287	Site formation and chronology of the new Paleolithic site Sima de Las Palomas de Teba, southern Spain	2016	10.1016/j.yqres.2016.01.007	HB	12.5 ± 0.5	1
618	288	The Oldest Evidence for Human Habitation in the Baltic Region: A Preliminary Report on the Chronology and Archaeological Context of the Riadino-5 Archaeological Site	2016	10.1002/gea.21553	not mentioned	not mentioned	4
619	289	Luminescence dating of glacial advances at Lago Buenos Aires (∼46 °S), Patagonia	2016	10.1016/j.quascirev.2015.12.010	S	10 ± 2	1
622	290	INFRARED STIMULATED LUMINESCENCE DATING OF 19TH CENTURY FLUVIAL DEPOSITS FROM THE UPPER RHINE RIVER	2016	10.1515/geochr-2015-0045	based on findings from https://doi.org/10.1515/geochr-2015-0045 they used HB but with bigger error	12.5 ± 1	1
626	291	Earliest hominin occupation of Sulawesi, Indonesia	2016	10.1038/nature16448	not mentioned	13 ± 1	4
628	292	FIRST APPLICATION OF OSL DATING TO A CHALCOLITHIC WELL STRUCTURE IN QULBAN BANI MURRA, JORDAN	2016	10.5281/zenodo.160962	not mentioned	not mentioned	4
631	293	Tectonic and climatic control on terrace formation: Coupling in situ produced 10Be depth profiles and luminescence approach, Danube River, Hungary, Central Europe	2016	10.1016/j.quascirev.2015.10.041	HB	12.5 ± 1	1
632	294	The chronostratigraphy of the latest Middle Pleistocene aeolian and alluvial activity on the Island of Hvar, eastern Adriatic, Croatia	2016	10.1111/bor.12141	HB	12.5 ± 0.5	1
633	295	Quartz and K-feldspar luminescence dating of a Marine Isotope Stage 5 megalake in the Juyanze Basin, central Gobi Desert, China	2015	10.1016/j.palaeo.2015.08.033	HB	12.5 ± 0.5	1
634	296	Evaluating the suitability of extended-range luminescence dating techniques over early and Middle Pleistocene timescales: Published datasets and case studies from Atapuerca, Spain	2015	10.1016/j.quaint.2014.08.010	HB	12.5 ± 0.5	1
635	297	Extended-range luminescence chronologies suggest potentially complex bone accumulation histories at the Early-to-Middle Pleistocene palaeontological site of Huescar-1 (Guadix-Baza basin, Spain)	2015	10.1016/j.quaint.2014.08.035	HB	12.5 ± 0.5	1
643	298	The feldspar pIRIR and quartz OSL on silty-clay sediments from walled ramparts in Orkhon Valley, Mongolia	2015	10.1016/j.quageo.2015.06.013	HB	12.5 ± 0.5	1
645	299	Age of a prehistoric Rodedian cult site constrained by sediment and rock surface luminescence dating techniques	2015	10.1016/j.quageo.2015.09.002	HB	12.5 ± 0.5	1
648	300	Thermally re-distributed IRSL (RD-IRSL): A new possibility of dating sediments near B/M boundary	2015	10.1016/j.quageo.2015.05.018	not mentioned	13.5 ± 0.5	4
651	301	Comparison of paired quartz OSL and feldspar post-IR IRSL dose distributions in poorly bleached fluvial sediments from South Africa	2015	10.1016/j.quageo.2015.02.015	HB	12.5 ± 0.5	1
652	302	Luminescence dating of Weichselian interstadial sediments from the German Baltic Sea coast	2015	10.1016/j.quageo.2015.05.015	HB	12.5 ± 0.5	1
654	303	Toward a luminescence chronology for coastal dune and beach deposits on Calvert Island, British Columbia central coast, Canada	2015	10.1016/j.quageo.2014.12.004	not mentioned	not mentioned	4
655	304	Luminescence dating of Middle Pleistocene (MIS 7) marine shoreline deposits along the eastern coast of Tunisia: A comparison of K-feldspar and Na-feldspar IRSL ages	2015	10.1016/j.quageo.2015.05.019	HB (for K FSP) + SB (for Na FSP)	12.5 ± 0.5 & 0.7 ± 0.7	1
658	305	Multiple approaches to date Japanese marker tephras using optical and ESR methods	2015	10.1016/j.quageo.2015.01.004	not clearly mentioned	not mentioned	4
659	306	Testing the application of post IR IRSL dating to Iron- and Viking-age ceramics and heated stones from Denmark	2015	10.1016/j.quageo.2015.05.014	HB	12.5 ± 0.5	1
672	307	The timing of the penultimate glaciation in the northern Alpine Foreland: new insights from luminescence dating	2015	10.1016/j.pgeola.2015.08.002	HB	12.5 ± 0.5	1
673	308	Optical dating of aeolian and fluvial sediments in north Tian Shan range, China: Luminescence characteristics and methodological aspects	2015	10.1016/j.quageo.2015.03.001	HB + HH + ZL + L3	13 ± 1	1
674	309	Holocene climate changes in westerly-dominated areas of central Asia: Evidence from optical dating of two loess sections in Tianshan Mountain, China	2015	10.1016/j.quageo.2015.04.002	ZL	13 ± 1	1
675	310	A detailed post-IR IRSL chronology for the last interglacial soil at the Jingbian loess site (northern China)	2015	10.1016/j.quageo.2015.02.022	HB	12.5 ± 1	1
676	311	High resolution OSL and post-IR IRSL dating of the last interglacial-glacial cycle at the Sanbahuo loess site (northeastern China)	2015	10.1016/j.quageo.2015.02.013	HB	12.5 ± 0.5	1
677	312	Maximum age limitation in luminescence dating of Chinese loess using the multiple-aliquot MET-pIRIR signals from K-feldspar	2015	10.1016/j.quageo.2015.01.002	HB + HH + ZL + L2	13 ± 1	1
678	313	Optical dating of the Yellow River terraces in the Mengjin area (China): First results	2015	10.1016/j.quageo.2015.03.006	HB + HH + ZL + L3	13 ± 1	1
679	314	Feldspar multi-elevated-temperature post-IR IRSL dating of the Wulanmulun Paleolithic site and its implication	2015	10.1016/j.quageo.2015.05.004	HB + ZL + L3	13 ± 1	1
690	315	Testing the application of quartz and feldspar luminescence dating to MIS 5 Japanese marine deposits	2015	10.1016/j.quageo.2015.05.008	measured K-concentration with ICP-OES but used HB	12.5 ± 0.5	3
694	316	Bleaching of the post-IR IRSL signal from individual grains of K-feldspar: Implications for single-grain dating	2015	10.1016/j.radmeas.2015.06.003	S	10 ± 2	1
695	317	OSL-thermochronometry of feldspar from the KTB borehole, Germany	2015	10.1016/j.epsl.2015.04.032	measured mineralogy (XRF) and used stochimetry to calculate the internal K-concentration	sample dependend 0.39-3.08 %	2
697	318	Non-linear response of the Golo River system, Corsica, France, to Late Quaternary climatic and sea level variations	2015	10.1016/j.quascirev.2015.04.021	not mentioned	12.5 ± 0.5	4
698	319	OSL dating of the Miam Qanat (KARIZ) system in NE Iran	2015	10.1016/j.jas.2015.04.006	HB	12.5 ± 0.5	1
699	320	Luminescence dating of Middle Pleistocene proglacial deposits from northern Switzerland: methodological aspects and stratigraphical conclusions	2015	10.1111/bor.12114	HB	12.5	1
700	321	Age and sedimentary record of inland eolian sediments in Lithuania, NE European Sand Belt	2015	10.1016/j.yqres.2015.04.001	HB	12.5 ± 0.5	1
703	322	A multi-method luminescence dating of the Palaeolithic sequence of La Ferrassie based on new excavations adjacent to the La Ferrassie 1 and 2 skeletons	2015	10.1016/j.jas.2015.01.019	HB	12.5 ± 0.5	1
704	323	Quartz OSL and K-feldspar pIRIR dating of a loess/paleosol sequence from arid central Asia, Tianshan Mountains, NW China	2015	10.1016/j.quageo.2015.03.011	HB	12.5 ± 0.5	1
706	324	Chronological and geoarchaeological investigations on an anthropogenic shell accumulation layer in the Longotoma dune field (Central Chile)	2015	10.1016/j.quaint.2014.06.005	not mentioned	not mentioned	4
707	325	A lake-level chronology based on feldspar luminescence dating of beach ridges at Tangra Yum Co (southern Tibet)	2015	10.1016/j.yqres.2015.03.002	not mentioned	not mentioned	4
717	326	Single-grain post-IR IRSL signals of K-feldspars from alluvial fan deposits in Baja California Sur, Mexico	2015	10.1016/j.quaint.2014.10.024	HB	12.5 ± 0.12	1
718	327	Further investigations on 'non-fading' in K-Feldspar	2015	10.1016/j.quaint.2014.11.018	not mentioned	12.5	4
719	328	Oasis evolution processes and mechanisms in the lower reaches of Heihe River, Inner Mongolia, China since 1 ka ago	2015	10.1177/0959683614561880	ZL	13 ± 1	1
728	329	Testing of a single grain OSL chronology across the Middle to Upper Palaeolithic transition at Les Cates (France)	2015	10.1016/j.jas.2014.11.020	HB + HH + ZL + L2	13 ± 1	1
729	330	Testing for sufficient signal resetting during sediment transport using a polymineral multiple-signal luminescence approach	2015	10.1016/j.quageo.2014.09.002	S	10 ± 2	1
732	331	Luminescence dating of glaciofluvial deposits linked to the penultimate glaciation in the Eastern Alps	2015	10.1016/j.quaint.2014.10.013	HB	12.5 ± 0.5	1
735	332	LUMINESCENCE DATING OF FLUVIAL DEPOSITS FROM THE WESER VALLEY, GERMANY	2015	10.1515/geochr-2015-0015	HB	12.5 ± 0.5	1
737	333	LUMINESCENCE DATING OF LOESS DEPOSITS FROM THE REMAGEN-SCHWALBENBERG SITE, WESTERN GERMANY	2015	10.1515/geochr-2015-0008	HB	12.5 ± 0.5	1
738	334	Luminescence dating of ice-marginal deposits in northern Germany: evidence for repeated glaciations during the Middle Pleistocene (MIS 12 to MIS 6)	2015	10.1111/bor.12083	HB	12.5 ± 0.5	1
740	335	LUMINESCENCE DATING OF FLUVIAL DEPOSITS IN THE ROCK SHELTER OF CUEVA ANTON, SPAIN	2015	10.1515/geochr-2015-0010	HB	12.5 ± 0.5	1
741	336	Late Glacial lake-level changes in the Lake Karakul basin (a closed glacierized-basin), eastern Pamirs, Tajikistan	2015	10.1016/j.yqres.2014.09.001	HB	12.5 ± 0.5	1
744	337	Middle-to-Upper Palaeolithic site formation processes at the Bordes-Fitte rockshelter (Central France)	2014	10.1016/j.jas.2014.09.013	HB	12.5 ± 0.5	1
745	338	The De (T, t) plot: A straightforward self-diagnose tool for post-IR IRSL dating procedures	2014	10.2478/s13386-013-0167-9	ZL	13 ± 1	1
747	339	Comparing different post-IR IRSL approaches for the dating of Holocene coastal foredunes from Ruhnu Island, Estonia	2014	10.2478/s13386-013-0169-7	not mentioned	not mentioned	4
749	340	New Luminescence Ages for the Galeria Complex Archaeological Site: Resolving Chronological Uncertainties on the Acheulean Record of the Sierra de Atapuerca, Northern Spain	2014	10.1371/journal.pone.0110169	HB	12.5 ± 0.5	1
764	341	Small aliquot and single grain IRSL and post-IR IRSL dating of fluvial and alluvial sediments from the Pativilca valley, Peru	2014	10.1016/j.quageo.2013.12.004	HB	12.5 ± 0.5	1
770	342	The evolution of a terrace sequence along the Manas River in the northern foreland basin of Tian Shan, China, as inferred from optical dating	2014	10.1016/j.geomorph.2014.01.009	HB + ZL + L2	13 ± 1	1
771	343	Late Quaternary history of the Vakinankaratra volcanic field (central Madagascar): insights from luminescence dating of phreatomagmatic eruption deposits	2014	10.1007/s00445-014-0817-7	SEM-EDX	8.4 ± 0.5 - 12.5 ± 06	2
772	344	Dry early Holocene revealed by sand dune accumulation chronology in Bayanbulak Basin (Xinjiang, NW China)	2014	10.1177/0959683614523804	HB	12.5 ± 0.5	1
774	345	Landscape evolution of the Ulan Buh Desert in northern China during the late Quaternary	2014	10.1016/j.yqres.2013.08.005	ZL	13 ± 1	1
775	346	Middle Pleistocene to Holocene coastal evolution of NW Sardinia (Mediterranean Sea, Italy)	2014	10.1016/j.quaint.2014.02.018	HB	12.0 ± 0.5	1
776	347	Characterization and dating of coastal deposits of NW Portugal (Minho-Neiva area): A record of climate, eustasy and crustal uplift during the Quaternary	2014	10.1016/j.quaint.2014.01.025	not mentioned	not mentioned	4
777	348	Testing a model of alluvial deposition in the Middle Son Valley, Madhya Pradesh, India - IRSL dating of terraced alluvial sediments and implications for archaeological surveys and palaeoclimatic reconstructions	2014	10.1016/j.quascirev.2014.02.004	HB	12.5 ± 0.5	1
778	349	Dating fluvial erosion: fluvial response to climate change in the Moselle catchment (France, Germany) since the Late Saalian	2014	10.1111/bor.12057	not mentioned (but mentioned that it is included)	not mentioned	4
779	350	Interaction of geomorphological processes on the north-eastern Tibetan Plateau during the Holocene, an example from a sub-catchment of Lake Donggi Cona	2014	10.1016/j.geomorph.2013.12.014	HB + ZL	12 ± 0.5 & 13 ± 1	1
781	351	A single-aliquot luminescence dating procedure for K-feldspar based on the dose-dependent MET-pIRIR signal sensitivity	2014	10.1016/j.quageo.2013.11.001	HB + HH + ZL + L3	13 ± 1	1
782	352	Towards successful OSL sampling strategies in glacial environments: deciphering the influence of depositional processes on bleaching of modern glacial sediments from Jostedalen, Southern Norway	2014	10.1016/j.quascirev.2014.02.001	HB	12	1
783	353	Luminescence dating of scoria fall and lahar deposits from Somma-Vesuvius, Italy	2014	10.1016/j.quageo.2013.10.005	SEM-EDX of SG -> average of K-rich grains	not mentioned	2
785	354	Revisiting the Palaeolithic site of Kulbulak (Uzbekistan): First results from luminescence dating	2014	10.1016/j.quaint.2013.09.011	HB	12.5 ± 0.5	1
787	355	PERFORMANCE OF DIFFERENT LUMINESCENCE APPROACHES FOR THE DATING OF KNOWN-AGE GLACIOFLUVIAL DEPOSITS FROM NORTHERN SWITZERLAND	2014	10.2478/s13386-013-0139-0	EMPA on SG of noe sample on ~50 grains with 12.9+-0.4 but used HB values with larger error	12.5 ± 1	3
793	356	Luminescence dating and palaeomagnetic age constraint on hominins from Sima de los Huesos, Atapuerca, Spain	2014	10.1016/j.jhevol.2013.12.001	HB	12.5 ± 0.5	1
797	357	Chronology of the Quaternary profile Zeuchfeld in Saxony-Anhalt/Germany - a preliminary luminescence dating study	2014	10.1127/0372-8854/2012/S-00112	HB + ZL + M2	12.5 ± 0.5	1
800	358	Late Quaternary active faulting and landscape evolution in relation to the Gowk Fault in the South Golbaf Basin, SE Iran	2014	10.1016/j.geomorph.2013.08.017	HB	12.5 ± 0.5	1
801	359	Quartz and K-feldspar optical dating chronology of eolian sand and lacustrine sequence from the southern Ulan Buh Desert, NW China: Implications for reconstructing late Pleistocene environmental evolution	2014	10.1016/j.palaeo.2013.11.003	HB + HH + ZL + L2	13 ± 1	1
803	360	Exploring the potential of luminescence methods for dating Alpine rock glaciers	2013	10.1016/j.quageo.2013.07.001	HB	12.5 ± 0.5	1
814	361	Fluvial response to Holocene volcanic damming and breaching in the Gediz and Geren rivers, western Turkey	2013	10.1016/j.geomorph.2013.07.016	not mentioned…just said they took it into account and cited https://doi.org/10.1016/j.quageo.2012.05.001 for that, they used HB 12.5 ± 0.5%	(probably) 12.5 ± 0.5	1
816	362	Environmental changes in Hunshandake (Otindag) sandy land revealed by optical dating and multi-proxy study of dune sands	2013	10.1016/j.jseaes.2013.07.035	HB + ZL + L2	13 ± 1	1
823	363	Late Neanderthals at Jarama VI (central Iberia)?	2013	10.1016/j.yqres.2013.06.010	HB	12.5 ± 0.5	1
826	364	Historical tsunami deposits in Peru: Sedimentology, inverse modeling and optically stimulated luminescence dating	2013	10.1016/j.quaint.2013.02.010	HB	12.5 ± 0.5	1
828	365	A new Middle Pleistocene interglacial record from Denmark: Chronostratigraphic correlation, palaeovegetation and fire dynamics	2013	10.1111/bor.12002	HB	12.5 ± 0.5	1
830	366	Luminescence dating of the PASADO core 5022-1D from Laguna Potrok Aike (Argentina) using IRSL signals from feldspar	2013	10.1016/j.quascirev.2013.03.018	HB	12.5 ± 0.5	1
832	367	A modified multi-elevated-temperature post-IR IRSL protocol for dating Holocene sediments using K-feldspar	2013	10.1016/j.quageo.2013.02.004	HB + ZL + L2	13 ± 1	1
835	368	Extending the age limit of luminescence dating using the dose-dependent sensitivity of MET-pIRIR signals from K-feldspar	2013	10.1016/j.quageo.2013.02.003	HB + HH + L3 + ZL	13 ± 1	1
855	369	Luminescence dating of fluvial deposits in Vojvodina, N Serbia: First results	2012	10.1016/j.quageo.2012.08.002	HB	12.5 ± 0.5	1
859	370	Holocene geomorphic processes and landscape evolution in the lower reaches of the Orkhon River (northern Mongolia)	2012	10.1016/j.catena.2012.06.003	not mentioned	not mentioned	4
862	371	Validating post IR-IRSL dating on K-feldspars through comparison with quartz OSL ages	2012	10.1016/j.quageo.2012.05.001	HB	12.5%	1
863	372	Natural variations in the properties of TL and IRSL emissions from metamorphic and volcanic K-feldspars from East Africa: Assessing their reliability for dating	2012	10.1016/j.radmeas.2012.03.001	HB	12.5% ± 0.5	1
864	373	Natural luminescence and anomalous fading in K-feldspar	2012	10.1016/j.radmeas.2012.04.018	not mentioned	not mentioned	4
865	374	Sources of overdispersion in a K-rich feldspar sample from north-central India: Insights from De, K content and IRSL age distributions for individual grains	2012	10.1016/j.radmeas.2012.04.005	WDS + HB	9-14 (2 grains with <0.25) + 12.5 ± 0.5	3
870	375	An exceptionally long paleoseismic record of a slow-moving fault: The Alhama de Murcia fault (Eastern Betic shear zone, Spain)	2012	10.1130/B30558.1	not mentioned	not mentioned	4
871	376	Records of human occupation from Pleistocene river terrace and aeolian sediments in the Arneiro depression (Lower Tejo River, central eastern Portugal)	2012	10.1016/j.geomorph.2012.02.017	not mentioned	12.5 ± 0.5	4
876	377	Determining the K-content of single-grains of feldspar for luminescence dating	2012	10.1016/j.radmeas.2012.01.014	LA-ICP-MS + ß counter	10 ± 2	2
887	378	Single-grain dating of young sediments using the pIRIR signal from feldspar	2012	10.1016/j.quageo.2012.04.016	calculated effective K based on brigthest grains and an assumed K-concentration of 12.5 ± 0.5% according to HB	11.2 and 11.6	1
892	379	Luminescence dating of an Upper Pleistocene alluvial fan and aeolian sandsheet complex: The Senne in the Munsterland Embayment, NW Germany	2012	10.1016/j.quageo.2012.02.012	HB	12.5 ± 0.5	1
897	380	Dating the recent past (<500 years) by post-IR IRSL feldspar - Examples from the North Sea and Baltic Sea coast	2012	10.1016/j.quageo.2012.04.011	HB	12.5 ± 0.5	1
898	381	Cross-check of the dating results obtained by ESR and IR-OSL methods: Implication for the Pleistocene palaeoenvironmental reconstructions	2012	10.1016/j.quageo.2012.02.005	not mentioned	not mentioned	4
899	382	OSL and IRSL dating of raised beach sand deposits along the southeastern coast of Norway	2012	10.1016/j.quageo.2011.11.009	ICP-MS	0.5Gy/ka	2
900	383	A comparison of TT-OSL and post-IR IRSL dating of coastal deposits on Cap Bon peninsula, north-eastern Tunisia	2012	10.1016/j.quageo.2012.03.010	HB	12.5 ± 0.5	1
902	384	Luminescence signals from modern sediments in a glaciated bay, NW Svalbard	2012	10.1016/j.quageo.2012.01.001	not clearly mentioned	not mentioned	4
904	385	Timing of the deglaciation in southern Patagonia: Testing the applicability of K-Feldspar IRSL	2012	10.1016/j.quageo.2012.02.019	HB	12.5 ± 0.5	1
906	386	Assessing the potential of luminescence dating for fault slip rate studies on the Garlock fault, Mojave Desert, California, USA	2012	10.1016/j.quageo.2012.03.013	not mentioned	not mentioned	4
907	387	Exploring fading in single grain feldspar IRSL measurements	2012	10.1016/j.quageo.2012.02.004	HB + DK	12.5 ± 5	1
908	388	The implication of sodium-rich plagioclase minerals contaminating K-rich feldspars aliquots in luminescence dating	2012	10.1016/j.quageo.2012.03.003	HB	12.5 ± 0.5	1
909	389	Optical dating of quartz and feldspars: A comparative study from Wonderkrater, a Middle Stone Age site of South Africa	2012	10.1016/j.quageo.2012.01.009	HB	not mentioned	4
910	390	A robust feldspar luminescence dating method for Middle and Late Pleistocene sediments	2012	10.1111/j.1502-3885.2012.00248.x	HB	12.5 ± 0.5	1
911	391	Testing a multi-step post-IR IRSL dating method using polymineral fine grains from Chinese loess	2012	10.1016/j.quageo.2011.12.004	HB + ZL + L2	13 ± 1	1
912	392	Luminescence dating of Chinese loess beyond 130 ka using the non-fading signal from K-feldspar	2012	10.1016/j.quageo.2011.12.005	HB + ZL + L2 + HH	13 ± 1	1
914	393	Luminescence dating of anthropogenic rock structures in the northern Rockies and adjacent High Plains, North America: A progress report	2012	10.1016/j.quageo.2011.11.006	SEM EDS	2.07-7.89 (average per site)	2
918	394	FELDSPAR LUMINESCENCE EVIDENCE FOR TWO MIDDLE PLEISTOCENE INTERGLACIAL SEA-LEVEL HIGHSTANDS (MIS 7 AND MIS 9) ALONG THE EASTERN COAST OF TUNISIA (SAHEL)	2012	https://www.researchgate.net/publication/287298385_Feldspar_luminescence_evidence_fortwo_middle_pleistocene_interglacial_sea-level_highstands_mis_7_and_mis_9_along_the_eastern_coast_of_Tunisia_Sahel	measured with neutron activation analysis	4 ± 1	2
920	395	Luminescence characteristics and dose distributions for quartz and feldspar grains from Mumba rockshelter, Tanzania	2012	10.1007/s12520-011-0085-9	HB	12.5% ± 0.5	1
922	396	New ages for Middle and Later Stone Age deposits at Mumba rockshelter, Tanzania: Optically stimulated luminescence dating of quartz and feldspar grains	2012	10.1016/j.jhevol.2012.02.004	HB	12.5% ± 0.5	1
923	397	Luminescence dating of Pleistocene alluvial sediments affected by the Alhama de Murcia fault (eastern Betics, Spain) - a comparison between OSL, IRSL and post-IR IRSL ages	2012	10.1111/j.1502-3885.2011.00230.x	HB	12.5 ± 0.5	1
928	398	Optically Stimulated Luminescence Chronology of Terrace Sediments of Siang River, Higher NE Himalaya: Comparison of Quartz and Feldspar Chronometers	2012	10.1007/s12594-012-0043-x	not mentioned	not mentioned	4
939	399	Stratigraphic and technological evidence from the middle palaeolithic-Ch(a)over-captelperronian-Aurignacian record at the Bordes-Fitte rockshelter (Roches d'Abilly site, Central France)	2012	10.1016/j.jhevol.2011.10.009	HB	12.5 ± 0.5	1
940	400	The variegated (VT) tephra: A new regional marker for middle to late marine isotope stage 5 across Yukon and Alaska	2011	10.1016/j.quaint.2011.06.028	not mentioned	not mentioned	4
941	401	Sedimentation and erosion processes in Middle to Late Pleistocene sequences exposed in the brickyard of Langenlois/Lower Austria	2011	10.1016/j.geomorph.2011.02.011	HB	12.5 ± 0.5	1
945	402	LUMINESCENCE DATING OF YOUNG COASTAL DEPOSITS FROM NEW ZEALAND USING FELDSPAR	2011	10.2478/s13386-011-0042-5	HB	12.5 ± 0.5	1
947	403	Isochron dating of sand-loess-soil deposits from the Mu Us Desert margin, central China	2011	10.1016/j.quageo.2011.08.004	HB + HH + ZL + L2	13 ± 1	1
949	404	Direct dating of Quaternary phreatic maar eruptions by luminescence methods	2011	10.1130/G32345.1	HB	12.5 ± 0.5	1
952	405	Coastal permafrost landscape development since the Late Pleistocene in the western Laptev Sea, Siberia	2011	10.1111/j.1502-3885.2011.00203.x	not mentioned	not mentioned	4
953	406	Luminescence dating of K-feldspar from sediments: A protocol without anomalous fading correction	2011	10.1016/j.quageo.2011.05.001	L2 + HB + ZL + HH	13 ± 1	1
960	407	Timing of the last interglacial in Northern Europe derived from Optically Stimulated Luminescence (OSL) dating of a terrestrial Saalian-Eemian-Weichselian sedimentary sequence in NE-Germany	2011	10.1016/j.quaint.2010.06.026	HB	12.5 ± 0.5	1
969	408	The potential of using K-rich feldspars for optical dating of young coastal sediments - A test case from Darss-Zingst peninsula (southern Baltic Sea coast)	2011	10.1016/j.quageo.2010.10.001	HB	12.5 ± 0.5	1
971	409	Luminescence dating of Upper Pleistocene loess from the Island of Susak in Croatia	2011	10.1016/j.quaint.2009.12.017	not mentioned	not mentioned	4
976	410	INFRARED RADIOFLUORESCENCE (IR-RF) DATING OF MIDDLE PLEISTOCENE FLUVIAL ARCHIVES OF THE HEIDELBERG BASIN (SOUTHWEST GERMANY)	2011	10.2478/s13386-011-0006-9	SG measurements on electron probe averaged per sample	12.66 ± 0.11 - 13.36 ± 0.08	2
977	411	Luminescence dating of Last Glacial and Early Holocene fluvial deposits from the Lower Rhine - methodological aspects and chronological framework	2011	10.1127/1860-1804/2011/0162-0047	HB	12.5 ± 0.5	1
979	412	COMPARISON OF THREE K-FELDSPAR LUMINESCENCE DATING METHODS FOR HOLOCENE SAMPLES	2011	10.2478/s13386-011-0011-z	ZL + L4	13 ± 1	1
983	413	Infrared stimulated luminescence measurements of single grains of K-rich feldspar for isochron dating	2011	10.1016/j.quageo.2010.02.003	HB + HH + ZL + L3	13 ± 1	1
985	414	Infrared stimulated luminescence dating of an Eemian (MIS 5e) site in Denmark using K-feldspar	2011	10.1111/j.1502-3885.2010.00156.x	HB	12.5 ± 0.5	1
987	415	Observation of unstable fast component in OSL of quartz	2011	10.1016/j.radmeas.2010.10.001	L3	13 ± 1	1
995	416	Late Pleistocene fluvial dynamics in the Hochrhein Valley and in the Upper Rhine Graben: chronological frame	2010	10.1007/s00531-009-0482-9	HB	12 ± 0.5	1
998	417	Luminescence dating of periods of sand movement from the Godollo Hills, Hungary	2010	10.1016/j.geomorph.2010.04.013	HB	12.5 ± 1 (mentioned that they modified it to ± 1)	1
1002	418	Geochronology for some key sites along the coast of Sardinia (Italy)	2010	10.1016/j.quaint.2009.12.020	HB	12.5 ± 0.5	1
1012	419	An ostracod-inferred large Middle Pleistocene freshwater lake in the presently hyper-arid Qaidam Basin (NW China)	2010	10.1016/j.quaint.2009.03.002	Neutron activation analysis	9 ± 1	2
1014	420	OSL dating of sediments from the Gobi Desert, Southern Mongolia	2010	10.1016/j.quageo.2009.06.002	HB	12.5 ± 0.5	1
1015	421	Infrared stimulated luminescence and radiofluorescence dating of aeolian sediments from Hungary	2010	10.1016/j.quageo.2009.05.002	HB	12.5 ± 1	1
1016	422	Testing the use of feldspars for optical dating of hurricane overwash deposits	2010	10.1016/j.quageo.2009.03.001	HB	12.5	1
1019	423	K-feldspar IRSL dating of a Pleistocene river terrace staircase sequence of the Lower Tejo River (Portugal, western Iberia)	2010	10.1016/j.quageo.2009.06.004	HB	12.0 ± 0.5	1
1020	424	IR-OSL studies of till and inter-till deposits from the Lithuanian Maritime Region	2010	10.1016/j.quageo.2009.04.004	not mentioned	it was taken into account	4
1023	425	Luminescence dating of archaeosediments: A comparison of K-feldspar and plagioclase IRSL ages	2010	10.1016/j.quageo.2009.03.004	HB + SEM results	1.9 ± 0.1 & 3.9 ± 0.3 & 12.5 ± 0.5	3
1029	426	CHRONOLOGY OF CAUVERY DELTA SEDIMENTS FROM SHALLOW SUBSURFACE CORES USING ELEVATED-TEMPERATURE POST-IR IRSL DATING OF FELDSPAR	2010	10.2478/v10003-010-0025-1	solution ICP-MS	11.4 ± 0.57 bis 12.57 ± 0.63	2
1030	427	METHODOLOGICAL ASPECTS ON LUMINESCENCE DATING OF FLUVIAL SANDS FROM THE MOSELLE BASIN, LUXEMBOURG	2010	10.2478/v10003-010-0006-4	HB	12.0 ± 0.5	1
1046	428	The potential of optically stimulated luminescence for dating periglacial slope deposits - A case study from the Taunus area, Germany	2009	10.1016/j.geomorph.2008.08.021	HB	12.0 ± 0.5	1
1054	429	Luminescence characteristics of quartz and feldspar from tectonically uplifted terraces in Kashmir Basin, Jammu and Kashmir, India	2009	10.1016/j.radmeas.2009.04.008	Aitken 1985 (TL dating) -> not mentioned clearly	Aitken 1985 (TL dating) -> not mentioned clearly	4
1057	430	Testing the potential of an elevated temperature IRSL signal from K-feldspar	2009	10.1016/j.radmeas.2009.02.007	HB	12	1
1064	431	Optically stimulated luminescence dating of a stratigraphic Late Glacial-Holocene sequence in the Po plain (Bubano quarry, Bologna, Italy)	2009	10.1016/j.quaint.2007.11.001	not considered	not considered	4
1065	432	Geomorphological correlation of the tectonically displaced Tejo River terraces (Gaviao-Chamusca area, central Portugal) supported by luminescence dating	2009	10.1016/j.quaint.2009.01.009	HB	12.5 ± 0.5	1
							summe
